# Supplementary material
Source: publisher figshare collection journal article supplement (https://geolsoc.figshare.com/ndownloader/files/26181383)
Supplement: Supplementary file 1 [file 26181383]

## Sheet: Final residual
Optimum Rank 6	Final Residuals	Linear Fit to Final residuals	Sum of Squared Residuals of linear fit to final residual					Residual A	Residual B	Residual C	Residual D	Residual Total
2	0.0596979	0.0583941	0.000327357
3	0.0520318	0.0521871	0.000160349
4	0.0437386	0.0459802	7.31748e-05
5	0.0395074	0.0397732	4.58321e-05
6	0.0365542	0.0335663	4.1427e-05
7	0.033914	0.0316876	4.44573e-05
8	0.0304493	0.0298089	4.94353e-05
9	0.0276969	0.0279302	5.92268e-05
10	0.0253025	0.0260515	7.30821e-05
11	0.023199	0.0241729	8.98709e-05
12	0.020606	0.0222942	0.00010837
13	0.0185292	0.0204155	0.000130086
14	0.0170755	0.0185368	0.000154928
15	0.0156692	0.0166581	0.000181176
16	0.014491	0.0147795	0.000207579
17	0.0128599	0.0129008	0.000232492
18	0.0112619	0.0110221	0.000256008
19	0.00983945	0.00914342	0.000278145
20	0.0088441	0.00726474	0.000298199
21	0.00644357	0.00538606	0.000313322
22	0.00520296	0.00350738	0.000324807
23	0.000175047	0.0016287	0.000327357
24
25
26
27
				0.000585249	0.000109101	4.52534e-05	5.43507e-05	9.30416e-05	0.000135482	0.000176096	0.000212777	0.000245329	0.000274843	0.000303061	0.000329501	0.000354858	0.000378881	0.000401552	0.000422514	0.000442543	0.000461581	0.00047953	0.000496359	0.00051212	0.000527065	0.000542009	0.000556291	0.000570646	0.000585249
		0.0503069
		0.037656
		0.0250051
		0.0243656
		0.023726
		0.0230865
		0.0224469
		0.0218074
		0.0211678
		0.0205283
		0.0198888
		0.0192492
		0.0186097
		0.0179701
		0.0173306
		0.016691
		0.0160515
		0.0154119
		0.0147724
		0.0141328
		0.0134933
		0.0128537
		0.0122142
		0.0115746
		0.0109351
		0.0102955
